# Supplementary material for: Navigating the complexities of the forest land sharing vs sparing logging dilemma: analytical insights through the governance theory of social-ecological systems dynamics
Source: PeerJ journal article supplement (doi:10.7717/peerj.16809), 2024-01-29
Supplement: Supplementary.File.S1.pdf [file Supplementary.File.S1.pdf]

1 Supplementary file S1 of the paper “Navigating the  
2 complexities of the forest land sharing vs sparing  
3 logging dilemma: analytical insights through the  
4 governance theory of social-ecological systems  
5 dynamics”

6 **Jean-Baptiste Pichancourt<sup>1</sup>**

7 **<sup>1</sup>Université Clermont-Auvergne (UCA), INRAE, Laboratoire d’Ingénierie des Systèmes**  
8 **Complexes (UR LISC), Centre de Clermont-Ferrand, 9 avenue Blaise Pascal, F-63178**  
9 **Aubière, France**

10 Corresponding author:

11 Jean-Baptiste Pichancourt<sup>1</sup>

12 Email address: jean-baptiste.pichancourt@inrae.fr

13 ABSTRACT

14 This supplementary file presents the detailed values used to produce Table 2 when the criteria of  
15 comparison is the forest-level average above-ground carbon stock (Table S1) or the average annual  
16 timber harvested (Table S2). The raw results from simulations used to construct the tables can be  
17 found in the supplementary spreadsheet.

| Mono-specific stand planted*                                                                             | Carbon stock<br>[tC.ha <sup>-1</sup> ] | Reference for comparison: land-sharing forest with different number of species harvested |           |           |           |           |           |           |           |           |
|----------------------------------------------------------------------------------------------------------|----------------------------------------|------------------------------------------------------------------------------------------|-----------|-----------|-----------|-----------|-----------|-----------|-----------|-----------|
|                                                                                                          |                                        | 1 species                                                                                | 2 species | 3 species | 4 species | 5 species | 6 species | 7 species | 8 species | Sparlines |
| Condition to meet: at least the performance of land-sharing with no collective constraints on harvesting |                                        |                                                                                          |           |           |           |           |           |           |           |           |
|                                                                                                          |                                        | 166                                                                                      | 158       | 152       | 146       | 140       | 132       | 125       | 117       |           |
| sp#1                                                                                                     | 34.23                                  | 0%                                                                                       | 0%        | 0%        | 0%        | 0%        | 0%        | 0%        | 0%        | ██        |
| sp#2                                                                                                     | 15.7                                   | 0%                                                                                       | 0%        | 0%        | 0%        | 0%        | 0%        | 0%        | 0%        | ██        |
| sp#3                                                                                                     | 149                                    | 0%                                                                                       | 0%        | 0%        | 2%        | 6%        | 11%       | 16%       | 22%       | ██        |
| sp#4                                                                                                     | 30.7                                   | 0%                                                                                       | 0%        | 0%        | 0%        | 0%        | 0%        | 0%        | 0%        | ██        |
| sp#5                                                                                                     | 51.7                                   | 0%                                                                                       | 0%        | 0%        | 0%        | 0%        | 0%        | 0%        | 0%        | ██        |
| sp#6                                                                                                     | 16.4                                   | 0%                                                                                       | 0%        | 0%        | 0%        | 0%        | 0%        | 0%        | 0%        | ██        |
| sp#7                                                                                                     | 111                                    | 0%                                                                                       | 0%        | 0%        | 0%        | 0%        | 0%        | 0%        | 0%        | ██        |
| sp#8                                                                                                     | 67                                     | 0%                                                                                       | 0%        | 0%        | 0%        | 0%        | 0%        | 0%        | 0%        | ██        |
| Condition to meet: at least the performance of land-sharing with compulsory harvest of sp#4              |                                        |                                                                                          |           |           |           |           |           |           |           |           |
|                                                                                                          |                                        | 177                                                                                      | 169       | 161       | 152       | 143       | 135       | 127       | 117       |           |
| sp#1                                                                                                     | 34.23                                  | 0%                                                                                       | 0%        | 0%        | 0%        | 0%        | 0%        | 0%        | 0%        | ██        |
| sp#2                                                                                                     | 15.7                                   | 0%                                                                                       | 0%        | 0%        | 0%        | 0%        | 0%        | 0%        | 0%        | ██        |
| sp#3                                                                                                     | 149                                    | 0%                                                                                       | 0%        | 0%        | 2%        | 6%        | 11%       | 16%       | 22%       | ██        |
| sp#4                                                                                                     | 30.7                                   | 0%                                                                                       | 0%        | 0%        | 0%        | 0%        | 0%        | 0%        | 0%        | ██        |
| sp#5                                                                                                     | 51.7                                   | 0%                                                                                       | 0%        | 0%        | 0%        | 0%        | 0%        | 0%        | 0%        | ██        |
| sp#6                                                                                                     | 16.4                                   | 0%                                                                                       | 0%        | 0%        | 0%        | 0%        | 0%        | 0%        | 0%        | ██        |
| sp#7                                                                                                     | 111                                    | 0%                                                                                       | 0%        | 0%        | 0%        | 0%        | 0%        | 0%        | 0%        | ██        |
| sp#8                                                                                                     | 67                                     | 0%                                                                                       | 0%        | 0%        | 0%        | 0%        | 0%        | 0%        | 0%        | ██        |
| Condition to meet: at least the performance of land-sharing with compulsory harvest of sp#3              |                                        |                                                                                          |           |           |           |           |           |           |           |           |
|                                                                                                          |                                        | 83                                                                                       | 97        | 106       | 112       | 115       | 116       | 116       | 117       |           |
| sp#1                                                                                                     | 34.23                                  | 0%                                                                                       | 0%        | 0%        | 0%        | 0%        | 0%        | 0%        | 0%        | ██        |
| sp#2                                                                                                     | 15.7                                   | 0%                                                                                       | 0%        | 0%        | 0%        | 0%        | 0%        | 0%        | 0%        | ██        |
| sp#3                                                                                                     | 149                                    | 44%                                                                                      | 35%       | 29%       | 25%       | 23%       | 22%       | 22%       | 21%       | ██        |
| sp#4                                                                                                     | 30.7                                   | 0%                                                                                       | 0%        | 0%        | 0%        | 0%        | 0%        | 0%        | 0%        | ██        |
| sp#5                                                                                                     | 51.7                                   | 0%                                                                                       | 0%        | 0%        | 0%        | 0%        | 0%        | 0%        | 0%        | ██        |
| sp#6                                                                                                     | 16.4                                   | 0%                                                                                       | 0%        | 0%        | 0%        | 0%        | 0%        | 0%        | 0%        | ██        |
| sp#7                                                                                                     | 111                                    | 25%                                                                                      | 13%       | 5%        | 0%        | 0%        | 0%        | 0%        | 0%        | ██        |
| sp#8                                                                                                     | 67                                     | 0%                                                                                       | 0%        | 0%        | 0%        | 0%        | 0%        | 0%        | 0%        | ██        |
| Condition to meet: at least the performance of land-sharing with forbidden harvest of sp#4               |                                        |                                                                                          |           |           |           |           |           |           |           |           |
|                                                                                                          |                                        | 178                                                                                      | 179       | 179       | 180       | 180       | 181       | 181       | na        |           |
| sp#1                                                                                                     | 34.23                                  | 0%                                                                                       | 0%        | 0%        | 0%        | 0%        | 0%        | 0%        | na        | ██        |
| sp#2                                                                                                     | 15.7                                   | 0%                                                                                       | 0%        | 0%        | 0%        | 0%        | 0%        | 0%        | na        | ██        |
| sp#3                                                                                                     | 149                                    | 0%                                                                                       | 0%        | 0%        | 0%        | 0%        | 0%        | 0%        | na        | ██        |
| sp#4                                                                                                     | 30.7                                   | 0%                                                                                       | 0%        | 0%        | 0%        | 0%        | 0%        | 0%        | na        | ██        |
| sp#5                                                                                                     | 51.7                                   | 0%                                                                                       | 0%        | 0%        | 0%        | 0%        | 0%        | 0%        | na        | ██        |
| sp#6                                                                                                     | 16.4                                   | 0%                                                                                       | 0%        | 0%        | 0%        | 0%        | 0%        | 0%        | na        | ██        |
| sp#7                                                                                                     | 111                                    | 0%                                                                                       | 0%        | 0%        | 0%        | 0%        | 0%        | 0%        | na        | ██        |
| sp#8                                                                                                     | 67                                     | 0%                                                                                       | 0%        | 0%        | 0%        | 0%        | 0%        | 0%        | na        | ██        |
| Condition to meet: at least the performance of land-sharing with forbidden harvesting of sp#3            |                                        |                                                                                          |           |           |           |           |           |           |           |           |
|                                                                                                          |                                        | 165                                                                                      | 155       | 147       | 140       | 140       | 133       | 125       | 117       |           |
| sp#1                                                                                                     | 34.23                                  | 0%                                                                                       | 0%        | 0%        | 0%        | 0%        | 0%        | 0%        | 0%        | ██        |
| sp#2                                                                                                     | 15.7                                   | 0%                                                                                       | 0%        | 0%        | 0%        | 0%        | 0%        | 0%        | 0%        | ██        |
| sp#3                                                                                                     | 149                                    | 0%                                                                                       | 0%        | 0%        | 1%        | 6%        | 11%       | 16%       | 21%       | ██        |
| sp#4                                                                                                     | 30.7                                   | 0%                                                                                       | 0%        | 0%        | 0%        | 0%        | 0%        | 0%        | 0%        | ██        |
| sp#5                                                                                                     | 51.7                                   | 0%                                                                                       | 0%        | 0%        | 0%        | 0%        | 0%        | 0%        | 0%        | ██        |
| sp#6                                                                                                     | 16.4                                   | 0%                                                                                       | 0%        | 0%        | 0%        | 0%        | 0%        | 0%        | 0%        | ██        |
| sp#7                                                                                                     | 111                                    | 0%                                                                                       | 0%        | 0%        | 0%        | 0%        | 0%        | 0%        | 0%        | ██        |
| sp#8                                                                                                     | 67                                     | 0%                                                                                       | 0%        | 0%        | 0%        | 0%        | 0%        | 0%        | 0%        | ██        |

Table S1. The percentage of land that can be spared for conservation varies depending on the type of mono-specific carbon plantation (using species sp#1 to sp#8). This was estimated by comparing the average above-ground forest level carbon stock over 100 years of simulations for each mono-specific stand and for land-shared forests described in ???. \*The values of functional traits for species sp#1 to sp#8 are presented in ??. Simulation results and analysis to produce the table can be found in the supplementary file 1. The original model used to produce the results can be found in ?.

| Mono-specific stand planted*                                                                             | Timber supply<br>[t.ha <sup>-1</sup> .y <sup>-1</sup> ] | Reference for comparison: land-sharing forest with different number of species harvested |           |           |           |           |           |           |           |           |
|----------------------------------------------------------------------------------------------------------|---------------------------------------------------------|------------------------------------------------------------------------------------------|-----------|-----------|-----------|-----------|-----------|-----------|-----------|-----------|
|                                                                                                          |                                                         | 1 species                                                                                | 2 species | 3 species | 4 species | 5 species | 6 species | 7 species | 8 species | Sparlines |
| Condition to meet: at least the performance of land-sharing with no collective constraints on harvesting |                                                         |                                                                                          |           |           |           |           |           |           |           |           |
|                                                                                                          |                                                         | .49                                                                                      | 1.51      | 2.46      | 2.46      | 3.69      | 4.01      | 4.95      | 5.6       |           |
| sp#1                                                                                                     | 2.79                                                    | 83%                                                                                      | 46%       | 12%       | 12%       | 0%        | 0%        | 0%        | 0%        | ▬         |
| sp#2                                                                                                     | .48                                                     | 0%                                                                                       | 0%        | 0%        | 0%        | 0%        | 0%        | 0%        | 0%        | ▬         |
| sp#3                                                                                                     | 6.25                                                    | 92%                                                                                      | 76%       | 61%       | 61%       | 41%       | 36%       | 21%       | 10%       | ▬         |
| sp#4                                                                                                     | 1.11                                                    | 56%                                                                                      | 0%        | 0%        | 0%        | 0%        | 0%        | 0%        | 0%        | ▬         |
| sp#5                                                                                                     | 0.02                                                    | 0%                                                                                       | 0%        | 0%        | 0%        | 0%        | 0%        | 0%        | 0%        | ▬         |
| sp#6                                                                                                     | 0.07                                                    | 0%                                                                                       | 0%        | 0%        | 0%        | 0%        | 0%        | 0%        | 0%        | ▬         |
| sp#7                                                                                                     | 0.03                                                    | 0%                                                                                       | 0%        | 0%        | 0%        | 0%        | 0%        | 0%        | 0%        | ▬         |
| sp#8                                                                                                     | 0.28                                                    | 0%                                                                                       | 0%        | 0%        | 0%        | 0%        | 0%        | 0%        | 0%        | ▬         |
| Condition to meet: at least the performance of land-sharing with compulsory harvest of sp#4              |                                                         |                                                                                          |           |           |           |           |           |           |           |           |
|                                                                                                          |                                                         | .08                                                                                      | 2.32      | 3.97      | 4.9       | 5.4       | 5.56      | 5.57      | 5.6       |           |
| sp#1                                                                                                     | 2.79                                                    | 100%                                                                                     | 14%       | 0%        | 0%        | 0%        | 0%        | 0%        | 0%        | ▬         |
| sp#2                                                                                                     | .48                                                     | 98%                                                                                      | 0%        | 0%        | 0%        | 0%        | 0%        | 0%        | 0%        | ▬         |
| sp#3                                                                                                     | 6.25                                                    | 100%                                                                                     | 62%       | 36%       | 22%       | 14%       | 11%       | 11%       | 10%       | ▬         |
| sp#4                                                                                                     | 1.11                                                    | 99%                                                                                      | 0%        | 0%        | 0%        | 0%        | 0%        | 0%        | 0%        | ▬         |
| sp#5                                                                                                     | 0.02                                                    | 67%                                                                                      | 0%        | 0%        | 0%        | 0%        | 0%        | 0%        | 0%        | ▬         |
| sp#6                                                                                                     | 0.07                                                    | 89%                                                                                      | 0%        | 0%        | 0%        | 0%        | 0%        | 0%        | 0%        | ▬         |
| sp#7                                                                                                     | 0.03                                                    | 74%                                                                                      | 0%        | 0%        | 0%        | 0%        | 0%        | 0%        | 0%        | ▬         |
| sp#8                                                                                                     | 0.28                                                    | 97%                                                                                      | 0%        | 0%        | 0%        | 0%        | 0%        | 0%        | 0%        | ▬         |
| Condition to meet: at least the performance of land-sharing with compulsory harvest of sp#3              |                                                         |                                                                                          |           |           |           |           |           |           |           |           |
|                                                                                                          |                                                         | .54                                                                                      | 1.27      | 1.99      | 2.71      | 3.43      | 4.14      | 4.86      | 5.6       |           |
| sp#1                                                                                                     | 2.79                                                    | 80%                                                                                      | 55%       | 29%       | 3%        | 0%        | 0%        | 0%        | 0%        | ▬         |
| sp#2                                                                                                     | .48                                                     | 0%                                                                                       | 0%        | 0%        | 0%        | 0%        | 0%        | 0%        | 0%        | ▬         |
| sp#3                                                                                                     | 6.25                                                    | 91%                                                                                      | 80%       | 68%       | 57%       | 45%       | 34%       | 22%       | 10%       | ▬         |
| sp#4                                                                                                     | 1.11                                                    | 51%                                                                                      | 0%        | 0%        | 0%        | 0%        | 0%        | 0%        | 0%        | ▬         |
| sp#5                                                                                                     | 0.02                                                    | 0%                                                                                       | 0%        | 0%        | 0%        | 0%        | 0%        | 0%        | 0%        | ▬         |
| sp#6                                                                                                     | 0.07                                                    | 0%                                                                                       | 0%        | 0%        | 0%        | 0%        | 0%        | 0%        | 0%        | ▬         |
| sp#7                                                                                                     | 0.03                                                    | 0%                                                                                       | 0%        | 0%        | 0%        | 0%        | 0%        | 0%        | 0%        | ▬         |
| sp#8                                                                                                     | 0.28                                                    | 0%                                                                                       | 0%        | 0%        | 0%        | 0%        | 0%        | 0%        | 0%        | ▬         |
| Condition to meet: at least the performance of land-sharing with forbidden harvest of sp#4               |                                                         |                                                                                          |           |           |           |           |           |           |           |           |
|                                                                                                          |                                                         | .56                                                                                      | .56       | .57       | .58       | .59       | .59       | .59       | na        |           |
| sp#1                                                                                                     | 2.79                                                    | 80%                                                                                      | 80%       | 79%       | 79%       | 79%       | 79%       | 79%       | na        | ▬         |
| sp#2                                                                                                     | .48                                                     | 0%                                                                                       | 0%        | 0%        | 0%        | 0%        | 0%        | 0%        | na        | ▬         |
| sp#3                                                                                                     | 6.25                                                    | 91%                                                                                      | 91%       | 91%       | 91%       | 91%       | 91%       | 91%       | na        | ▬         |
| sp#4                                                                                                     | 1.11                                                    | 50%                                                                                      | 49%       | 48%       | 48%       | 47%       | 47%       | 46%       | na        | ▬         |
| sp#5                                                                                                     | 0.02                                                    | 0%                                                                                       | 0%        | 0%        | 0%        | 0%        | 0%        | 0%        | na        | ▬         |
| sp#6                                                                                                     | 0.07                                                    | 0%                                                                                       | 0%        | 0%        | 0%        | 0%        | 0%        | 0%        | na        | ▬         |
| sp#7                                                                                                     | 0.03                                                    | 0%                                                                                       | 0%        | 0%        | 0%        | 0%        | 0%        | 0%        | na        | ▬         |
| sp#8                                                                                                     | 0.28                                                    | 0%                                                                                       | 0%        | 0%        | 0%        | 0%        | 0%        | 0%        | na        | ▬         |
| Condition to meet: at least the performance of land-sharing with forbidden harvesting of sp#3            |                                                         |                                                                                          |           |           |           |           |           |           |           |           |
|                                                                                                          |                                                         | .48                                                                                      | .94       | 1.76      | 2.79      | 3.87      | 4.85      | 5.55      | na        |           |
| sp#1                                                                                                     | 2.79                                                    | 83%                                                                                      | 66%       | 37%       | 0%        | 0%        | 0%        | 0%        | na        | ▬         |
| sp#2                                                                                                     | .48                                                     | 0%                                                                                       | 0%        | 0%        | 0%        | 0%        | 0%        | 0%        | na        | ▬         |
| sp#3                                                                                                     | 6.25                                                    | 92%                                                                                      | 85%       | 72%       | 55%       | 38%       | 22%       | 11%       | na        | ▬         |
| sp#4                                                                                                     | 1.11                                                    | 57%                                                                                      | 15%       | 0%        | 0%        | 0%        | 0%        | 0%        | na        | ▬         |
| sp#5                                                                                                     | 0.02                                                    | 0%                                                                                       | 0%        | 0%        | 0%        | 0%        | 0%        | 0%        | na        | ▬         |
| sp#6                                                                                                     | 0.07                                                    | 0%                                                                                       | 0%        | 0%        | 0%        | 0%        | 0%        | 0%        | na        | ▬         |
| sp#7                                                                                                     | 0.03                                                    | 0%                                                                                       | 0%        | 0%        | 0%        | 0%        | 0%        | 0%        | na        | ▬         |
| sp#8                                                                                                     | 0.28                                                    | 0%                                                                                       | 0%        | 0%        | 0%        | 0%        | 0%        | 0%        | na        | ▬         |

Table S2. The percentage of land that can be spared for conservation varies depending on the type of mono-specific timber plantation (using species sp#1 to sp#8). This was estimated by comparing the average performances in timber supply over 100 years of simulations for each mono-specific stand and for land-shared forests described in ???. \*The values of functional traits for species sp#1 to sp#8 are presented in ??. Simulation results and analysis to produce the table can be found in the supplementary file 1. The original model used to produce the results can be found in ?.
